# Supplementary material for: An Intelligent Detection Method of Personal Privacy Disclosure for Social Networks
Source: Hindawi journal article supplement (doi:10.1155/2021/5518220), 2021-04-23
Supplement: f1 [file 5518220.f1.docx]

**Appendix I**

The following is the detailed information of the questionnaire. According to the number, it is divided into five levels, 5 is the highest, and it is gradually decreased in order, and 1 is the lowest.

1. Have you disclosed your account number and password to others in WeChat? [Single-choice question] *

| ○5 | ○4 | ○3 | ○2 | ○1 |
| --- | --- | --- | --- | --- |

2. Do you often use WeChat wallets to transfer money to strangers (not WeChat friends)?

| ○5 | ○4 | ○3 | ○2 | ○1 |
| --- | --- | --- | --- | --- |

3. Do you often use WeChat wallet to transfer money to WeChat friends? [Single-choice question] *

| ○5 | ○4 | ○3 | ○2 | ○1 |
| --- | --- | --- | --- | --- |

4. Are strangers allowed to view ten circles of friends? [Single-choice question] *

| ○Yes | ○No |  |  |  |
| --- | --- | --- | --- | --- |

5. Is the "People nearby" function turned off? [Single-choice question] *

| ○Open | ○Close |  |  |  |
| --- | --- | --- | --- | --- |

6. How to add friends in WeChat settings? [Single-choice question] *

| ○No verification required; can be searched through WeChat, QQ number, mobile phone number; can be added through group chat, QR code, business card. |
| --- |
| ○No verification required; can be searched through WeChat, QQ number, mobile phone number; not added through group chat, QR code, business card. |
| ○Requires verification; can be searched by WeChat, QQ number, mobile phone number; can be added through group chat, QR code, business card. |
| ○Requires verification; can be searched by WeChat, QQ number, mobile phone number; not added by group chat, QR code, business card. |
| ○Requires verification; cannot be searched by WeChat, QQ or mobile phone number; can be added through group chat, QR code, business card. |

7. Is positioning often used when making friends? [Single-choice question] *

| ○5 | ○4 | ○3 | ○2 | ○1 |
| --- | --- | --- | --- | --- |

8. Do you use applets in WeChat? [Single-choice question] *

| ○5 | ○4 | ○3 | ○2 | ○1 |
| --- | --- | --- | --- | --- |
